# Supplementary material for: Local Tree Diversity Suppresses Foliar Fungal Infestation and Decreases Morphological but Not Molecular Richness in a Young Subtropical Forest
Source: J Fungi (Basel). 2021 Feb 27;7(3):173. doi: 10.3390/jof7030173 (PMC7997179; doi:10.3390/jof7030173)
Supplement: Supplementary file 1 [file jof-07-00173-s001.zip › SM joF Table S1 and S2.xlsx]

## Sheet: Table S1
Table S1. Detected fungal species/fungal complexes per tree species by visual assessment, their fungal order/class and their life style under specification of new records (new fungus species, new host, new in China)
Tree species	Fungus complex/species	Fungal order/class	Life style	New records
Castanea henryi	CAAP complex:
	Colletotrichum gloeosporioides s. lat.	Sordariomycetes	pathogenic
	Phyllosticta sp.	Botryospaeriales	pathogenic
	Asterina sp.	Dothideomycetes	pathogenic
	Asteromella sp.	Capnodiales	pathogenic
	PAP complex:
	Pestalotiopsis distincta	Xylariales	pathogenic
	Phyllosticta sp.	Botryospaeriales	pathogenic
	Asterina sp.	Dothideomycetes	pathogenic
	Tubakia chinensis	Diaporthales	pathogenic	species
	Microthyrium sp.	Microthyriales	-
Castanopsis sclerophylla	Ascomycet-Cs 4 (Hyphomycete)	-	-
	Erysiphe castaneigena	Erysiphales	pathogenic	host
	MAA³ complex:
	Monochaetia dimorphospora	Xylariales	-	host
	Asteromella sp.	Capnodiales	pathogenic
	Ascomycet-Cs 1, 2, and 3	-	pathogenic
	Micropeltis sp.	Dothideomycetes	-
	Microthyrium sp.	Microthyriales	-
Choerospondias axilaris	Ascomycet-Ca 1	-	pathogenic
	Phyllactinia rhoina	Erysiphales	pathogenic
	Ramichloridium sp.	Capnodiales	pathogenic
Liquidambar formosana	Ascomycet-Lf 1	-	pathogenic
	Erysiphe cf. liquidambaris	Erysiphales	pathogenic
	Micropeltis sp.	Dothideomycetes	-
	Microthyrium sp.	Microthyriales	-
	Periconiella liquidambaricola	Capnodiales	pathogenic	species
Nyssa sinensis	Ascomycet-Ns 1 (Hyphomycete)	-	-
	Pseudocercospora chibaensis	Capnodiales	pathogenic	China
	Tubercularia sp.	Hypocreales	pathogenic
Quercus serrata	Ascomycet-Qs 1	-	pathogenic
	Erysiphe alphitoides	Erysiphales	pathogenic
	Meliolaceae	Meliolales	pathogenic
	Microthyrium sp.	Microthyriales	-
	Phyllosticta sp.	Botryospaeriales	pathogenic
Sapindus saponaria	Guignardia sp. (Phyllosticta sp.)	Botryospaeriales	pathogenic
	Microthyrium sp.	Microthyriales	-
	Monodictys sp.	Dothideomycetes	-
Triadica sebifera	Microthyrium sp.	Microthyriales	-
	Ramichloridium sp.	Capnodiales	pathogenic
	Stanjehughesia sp.	Sordariales	-

## Sheet: Table S2
Table S2. List of operational taxonomic units taxa identified by Megan/GenBankNCBI/Unit and their ecological guilds by FunGuild
OTU ID	Megan	NCBI Access	NCBI	Score	Unite	UNITE	Score	Guild
OTU1	Cladosporium	AJ876482.1	Cladosporium cladosporioides	219	MG813175	Cladosporium aggregatocicatricatum	282	Endophyte-Epiphyte-Plant Pathogen
OTU10	Mycosphaerellaceae	AY840540.1	Cercospora apiicola	172	MF951396	Xenosonderhenioides indonesiana	226	plant pathogen
OTU100	Rhizopycnis	AF022786.1	Rhizopycnis vagum	143	MK347732	Acrocalymma pterocarpi	248	Endophyte-Plant Pathogen
OTU101	Aspergillus sp.	AF134810.1	Aspergillus sp.	267	U65309	Aspergillus aculeatus	326	Plant Pathogen
OTU102	Arthrinium sp.	AJ279479.1	Arthrinium sp.	333	MN538266	Apiospora montagnei	325	Dung Saprotroph-Plant Pathogen
OTU103	Tremellomycetes	NR_077105.1	Filobasidium wieringae	241	NR_077105	Filobasidium wieringae	235	Undefined Saprotroph
OTU104	Preussia sp.	AY510412.1	Preussia australis	152	MN105404	Preussia flanaganii	172	Undefined Saprotroph
OTU105	Rhodosporidiobolus	AB073240.1	Rhodosporidiobolus fluvialis	174	KY104695	Rhodosporidiobolus colostri	269	Undefined Saprotroph
OTU106	Aurantiporus	AJ006683.1	Aurantiporus alborubescens	148	MK404480	Crustodontia chrysocreas	342	Wood Saprotroph
OTU107	Capnodiales	AY843175.1	Fungal sp.	219	KT957792	Catenulostroma	257	Plant Pathogen
OTU108	Sordariomycetes	M77163.1	Fungal 18S	156	MK353083	Bartalinia robillardoides	306	Plant Pathogen
OTU109	Cryptococcus	AY040655.1	Cryptococcus victoriae	202	LT602878	Vishniacozyma	241	Animal Pathogen-Litter Saprotroph
OTU11	Tremellomycetes	AF444375.1	Naganishia diffluens	279	MN398201	Naganishia diffluens	279	na
OTU110	Capnodiales	AJ238474.1	Hortaea werneckii	137	MF529177	Ascomycota	269	NULL
OTU111	Chaetothyriales	AJ244274.1	Sarcinomyces petricola	296	MG433466	Fungi	356	Endophyte
OTU112	Amphisphaeriaceae sp.	AY853245.1	Amphisphaeriaceae sp.	189	KP991750	Sordariomycetes	192	Undefined Saprotroph
OTU113	Sporotrichum sp.	AJ428045.1	Sporotrichum laxum	235	KP676125	Phanerochaete laevis	295	Plant Pathogen
OTU114	Kockovaella	NR_137140.1	Kockovaella sp.	106	AB042225	Kockovaella sp.	136	Epiphyte
OTU115	Polyporaceae	AJ438139.1	Trametes trogii	359	MK460880	Trametes trogii	351	Wood Saprotroph
OTU116	Pleosporineae	AJ428530.1	Phoma glomerata	244	MN420662	Didymella macrostoma	251	Plant Pathogen-Wood Saprotroph
OTU117	Agaricomycetes incertae sedis	AY840588.1	Trametes versicolor	335	DQ674379	Trametes versicolor	333	Wood Saprotroph
OTU118	Erythrobasidium hasegawianum	AB036065.1	Erythrobasidium hasegawianum	252	LT610010	Erythrobasidium	262	Undefined Saprotroph
OTU119	Athelia pellicularis	U85799.1	Athelia pellicularis	322	MN430939	Phanerochaete chrysosporium	343	Wood Saprotroph
OTU12	Tremellales	NR_111012.1	Derxomyces mrakii	327	JN942316	Derxomyces mrakii	325	na
OTU120	Polyporus squamosus	DQ267123.1	Polyporus squamosus	359	MF686503	Cerioporus squamosus	351	Wood Saprotroph
OTU121	Trimmatostroma sp.	AJ244268.1	Trimmatostroma sp.	182	KF436353	Capnodiales sp.	250	Lichen Parasite
OTU122	Coniothyrium sp.	AJ301726.1	Coniothyrium sp.	274	MH245082	Paraphoma chrysanthemicola	307	Plant Pathogen
OTU123	Trametes	AY840569.1	Trametes sp.	294	EU009977	Trametes sp.	349	Wood Saprotroph
OTU124	Phoma	AY831563.1	Phoma medicaginis	60.2	UDB0757181	Fungal sp.	134	Plant Pathogen
OTU125	Rhodosporidiobolus lusitaniae	AB087497.1	Rhodosporidium lusitaniae	248	KU609501	Rhodosporidiobolus lusitaniae	250	Undefined Saprotroph
OTU126	Ganoderma	X87354.1	Ganoderma sp.	255	JQ861752	Perenniporia subtephropora	351	Plant Pathogen-Wood Saprotroph
OTU127	Mycosphaerellaceae	AY509742.1	Mycosphaerella aurantia	171	LC168794	Pseudocercospora	266	Plant Pathogen
OTU128	Dothideomycetes	AJ496631.1	Phaeosphaeria phragmitis	124	MF330210	Phaeosphaeriopsis	250	Undefined Saprotroph-Plant Pathogen-Endophyte
OTU129	Polyporaceae	AY840566.1	Trametes sp.	233	MN416288	Trametes sanguinea	347	Wood Saprotroph
OTU13	Trimorphomyces papilionaceus	AF444483.1	Trimorphomyces papilionaceus	274	KP691952	Bullera vrieseae		Undefined Saprotroph
OTU130	Acremonium	AM176679.1	Acremonium alternatum	191	MN518379	Acremonium	262	Wood Saprotroph
OTU131	Stagonospora sp.	AJ496627.1	Stagonospora sp.	283	GU581230	Phaeosphaeriaceae	313	Plant Pathogen
OTU132	Mycosphaerellaceae	AY840531.1	Cercospora beticola	246	MK929028	Septoria	253	Plant Pathogen
OTU133	Phaeosphaeriaceae	L07735.1	Leptosphaeria maculans	86.1	MK522507	Leptospora	342	Plant Pathogen
OTU134	Cochliobolus	AF071323.1	Cochliobolus ellisii	255	MN547547	Curvularia lunata	293	Endophyte-Plant Pathogen
OTU135	Diatrypaceae	AJ302464.1	Eutypella prunastri	311	MH862067	Eutypa quercicola	320	Plant Pathogen
OTU136	Trichothecium roseum	U51982.1	Trichothecium roseum	228	MN372207	Trichothecium roseum	313	Plant Pathogen
OTU137	Dikarya	na	na	na	na	na	na	na
OTU138	Agaricomycetes incertae sedis	AF210822.1	Peniophora aurantiaca	224	MK247852	Peniophora	349	Plant Pathogen-Wood Saprotroph
OTU139	leotiomyceta	AJ301970.1	Glomerella lagenaria	219	MK876408	Ramularia pistaciae	259	Plant Pathogen
OTU14	Vishniacozyma globospora	NR_073235.1	Vishniacozyma globospora	62.1	KM246182	Cryptococcus dimennae	179	Animal Pathogen-Endophyte-Epiphyte-Undefined Saprotroph
OTU140	Filobasidium oeirense	NR_077106.1	Filobasidium oeirense	268	MG589245	Filobasidium oeirense	275	Undefined Saprotroph
OTU141	Dothideomycetes	AY843139.1	Fungal sp.	167	GQ851768	Capnodiales	244	na
OTU142	Fusarium oxysporum	AY928416.1	Fusarium oxysporum	267	MN534794	Fusarium sacchari	266	Animal Pathogen-Endophyte-Plant Pathogen-Wood Saprotroph
OTU143	Periconia macrospinosa	AJ246159.1	Periconia macrospinosa	130	JQ781723	Periconia macrospinosa	269	Endophyte
OTU144	Mycosphaerella	NR_119428.1	Uwebraunia dekkeri	296	MG980594	Uwebraunia dekkeri	289	Undefined Saprotroph
OTU145	Dothideomycetes	AJ496628.1	Septoria arundinacea	130	KX306765	Phaeosphaeria lunariae	197	Undefined Saprotroph
OTU146	Peniophora	AF119518.1	Peniophora cinerea	342	MK588767	Peniophora	350	Wood Saprotroph
OTU147	Diatrypella	AJ302442.1	Diatrypella prominens	84.2	KX986028	Nigrospora chinensis	264	Plant Pathogen
OTU148	Pleosporineae	DQ087400.1	Phoma pinodella	211	MH884079	Phoma	251	Plant Pathogen
OTU149	Polyporaceae	AY684172.1	Coriolopsis gallica	353	MH856754	Coriolopsis gallica	351	Wood Saprotroph
OTU15	Buckleyzyma salicina	AB038127.1	Buckleyzyma salicina	263	KT809038	Buckleyzyma salicina	262	Undefined Saprotroph
OTU150	Emericellopsis	U57676.1	Emericellopsis terricola	300	U57676	Emericellopsis terricola	293	Undefined Saprotroph
OTU151	Cryptococcus	AY040655.1	Cryptococcus victoriae	132	MG250423	Vishniacozyma carnescens	244	Animal Pathogen-Litter Saprotroph
OTU152	Eutypella	AJ302465.1	Eutypella scorparia	350	MK881164	Eutypella	352	Plant Pathogen
OTU153	Tremellomycetes	NR_077105.1	Filobasidium wieringae	76.8	MK050347	Filobasidiales	280	Undefined Saprotroph
OTU154	unclassified Phoma	AJ301711.1	Phoma glomerata	233	MH857263251	Ascochyta pisi	251	Plant Pathogen-Wood Saprotroph
OTU155	unclassified Ganoderma	AF094513.1	Ganoderma sp.	361	MN396337	Polyporus lipsiensis	363	Plant Pathogen-Wood Saprotroph
OTU156	Diplomitoporus	AJ006682.1	Diplomitoporus lindbladii	163	JF692199	Amylosporus bracei	300	Wood Saprotroph
OTU157	Phaeosphaeria	U04237.1	Phaeosphaeria nodorum	276	GU062238	Phaeosphaeria	320	Plant Pathogen
OTU158	Agaricomycetes incertae sedis	AF210830.1	Peniophora erikssonii	270	MH857640	Peniophora rufomarginata	340	Plant Pathogen-Wood Saprotroph
OTU159	Mycosphaerellaceae	AJ417496.1	Ramularia sp.	228	KX287323	Ramularia agrimoniae	246	Plant Pathogen
OTU16	Mycosphaerella sp.	AY509766.1	Mycosphaerella marksii	265	MN065471	Ramichloridium sp.	259	Plant Pathogen
OTU160	Stephanonectria keithii	AF210671.1	Stephanonectria sp.	65.8	FJ425669	Xylariaceae	228	Undefined Saprotroph
OTU161	Cystofilobasidium macerans	AF444317.1	Cystofilobasidium macerans	268	MG938354	Cystofilobasidium macerans	262	Leaf Saprotroph
OTU162	Preussia sp.	AY510424.1	Preussia pseudominima	263	MH165214	Preussia sp.	263	Undefined Saprotroph
OTU163	Hyphoderma	AJ534274.1	Hyphoderma subsetigerum	309	MK269023	Hyphoderma subsetigerum		Undefined Saprotroph
OTU164	Naevala minutissima	AY853228.1	Naevala minutissima	291	AY853228	Naevala perexigua	284	na
OTU165	Phaeosphaeria pontiformis	U04237.1	Phaeosphaeria nodorum	169	KT269529	Phaeosphaeria sp.	315	Plant Pathogen
OTU166	Diaporthales	AB017734.1	Phomopsis asparagi	309	MK247818	Diaporthe	315	Plant Pathogen
OTU167	Dothideomycetes	AJ496632.1	Phaeosphaeria pontiformis	324	AM901779	Phaeosphaeriaceae	338	Undefined Saprotroph-Plant Pathogen-Endophyte
OTU168	Tremellomycetes	AF444388.1	Filobasidium magnum	167	MG589199	Filobasidium magnum	232	Undefined Saprotroph
OTU169	Capsulospora sp.	AF009819.1	Capsulospora sp.	309	KM519248	Sordariomycetes	306	na
OTU17	unclassified Cryptococcus	AJ345008.1	Cryptococcus sp.	202	MN427970	Papiliotrema flavescens	197	Animal Pathogen-Endophyte-Epiphyte-Undefined Saprotroph
OTU170	Ellurema indica	AF009816.1	Ellurema indica	128	MN077366	Beltrania rhombica	291	Endophyte
OTU171	Cordycipitaceae	AJ876485.1	Beauveria bassiana	300	MK490879	Beauveria bassiana	293	Animal Pathogen
OTU172	Mycosphaerellaceae	AY840531.1	Cercospora beticola	263	MN419241	Cercospora canescens	257	Plant Pathogen
OTU173	Aspergillus sp.	AM158245.1	Aspergillus sp.	287	MN533784	Aspergillus ochraceus	311	Animal Pathogen
OTU174	Coniosporium sp.	AJ244272.1	Coniosporium apollinis	313	AJ244272	Coniosporium apollinis	306	Undefined Saprotroph
OTU175	Tremellomycetes	AF444363.1	Filobasidium magnum	254	MN128847	Filobasidium magnum	248	Undefined Saprotroph
OTU176	Sordariaceae	AJ002400.1	Gelasinospora nigeriensis	`	NR_077163	Gelasinospora tetrasperma	338	Undefined Saprotroph
OTU177	Monochaetia monochaeta	AY853243.1	Monochaetia monochaeta	130	MH553953	Monochaetia ilexae	248	Plant Pathogen
OTU178	Coniothyrium sp.	AY842358.1	Coniothyrium sp.	215	MK911665	Paraphaeosphaeria michotii	322	Plant Pathogen
OTU179	Mycosphaerellaceae	AY840531.1	Cercospora sp.	231	MK396572	Sphaerulina berberidis	235	Plant Pathogen
OTU18	Ramichloridium sp.	AF050286.1	Ramichloridium cerophilum	250	MK530511	Zasmidium fructigenum	266	Plant Pathogen
OTU180	Eurotiales	L14505.1	Penicillium minioluteum	302	MN540956	Talaromyces amestolkiae	322	Animal Pathogen
OTU181	Polyporaceae	AY840572.1	Trametes sp.	327	MK715427	Trametes hirsuta	342	Wood Saprotroph
OTU182	Cladosporiaceae	AJ549923.1	Cladosporium herbarum	285	MN486550	Cladosporium herbarum	279	Plant Pathogen-Wood Saprotroph
OTU183	leotiomyceta	DQ006957.1	Diatrype	82.4	MH863753	Hansfordia pulvinata	277	Plant Pathogen
OTU184	Ganoderma adspersum	X78742.1	Ganoderma adspersum	366	MK422152	Ganoderma adspersum	363	Plant Pathogen-Wood Saprotroph
OTU185	Kockovaella prillingeri	AF444463.1	Kockovaella prillingeri	119	KY103854	Kockovaella mexicana	141	Epiphyte
OTU186	Mycosphaerella	AY853183.1	Mycosphaerella punctiformis	76.8	MF529172	Ascomycota	253	Plant Pathogen
OTU187	Botryosphaeria sp.	AB034814.1	Botryosphaeria dothidea	324	MN105577	Botryosphaeria sp.	324	Plant Pathogen
OTU188	leotiomyceta	AM084826.1	Ascomycete sp.	246	MH859539	Paraphaeosphaeria angularis	316	Undefined Saprotroph
OTU189	Tritirachium	AB109761.1	Tritirachium sp.	265	MK929041	Parengyodontium album	327	Undefined Saprotroph
OTU19	Buckleyzyma aurantiaca	AB038113.1	Buckleyzyma aurantiaca	255	MF102877	Buckleyzyma aurantiaca	260	Undefined Saprotroph
OTU190	Fusarium sp.	U85547.1	Fusarium kyushuense	274	U85547	Fusarium kyushuense | Japan China	268	Endophyte-Plant Pathogen
OTU191	Penicillium digitatum	AY924259.1	Penicillium digitatum	322	MN186850	Penicillium digitatum	315	Plant Pathogen
OTU192	Symmetrospora marina	U65598.1	Basidiomycete from a bamboo	385	KR912282	Symmetrospora symmetrica	392	na
OTU193	Chalaropsis sp.	AY843058.1	Fungal sp.	411	KP004448	Rachicladosporium eucalypti	463	Endophyte-Plant Pathogen-Wood Saprotroph
OTU194	Typhula ishikariensis var. canadensis	AF193370.1	Typhula ishikariensis	255	AB889547	Typhula variabilis	499	Plant Pathogen
OTU195	Neophaeosphaeria barrii	AF466301.1	Neophaeosphaeria barrii	387	MN153805	Alternaria longipes	497	Endophyte-Plant Pathogen
OTU196	Cryptococcus sp.	AJ875344.1	Uncultured fungus	453	KX096667	Vishniacozyma tephrensis	499	na
OTU197	Lycium ruthenicum	AY880681.1	Lycium ruthenicum	510	MN548785	Alternaria alternata	499	Saprotroph
OTU198	Botryosphaeria	AY843155.1	Fungal sp.	178	KM216350	Botryosphaeriales	354	Endophyte-Plant Pathogen
OTU199	Coniosporium apollinis	AY843130.1	Fungal sp.	351	AJ971453	Coniosporium	474	Undefined Saprotroph
OTU2	Didymosphaeriaceae	AB096264.1	Paraphaeosphaeria sp.	322	MK990140	Microsphaeropsis arundinis	354	Plant Pathogen
OTU20	Basidiomycota	AJ276054.1	Rhizoctonia solani	355	MN275847	Agaricomycetes	347	Plant Pathogen
OTU200	Aureobasidium pullulans	AM176728.1	Aureobasidium pullulans	508	MN244405	Aureobasidium pullulans	497	Animal Pathogen-Endophyte-Epiphyte-Plant Pathogen
OTU201	Tremella aurantia	NR_155873.1	Tremella aurantia	279	HQ631056	Dimennazyma	492	Fungal Parasite
OTU202	Chaetomium	AJ458185.1	Chaetomium nigricolor	435	MK120120	Apodus oryzae	451	Animal Pathogen-Endophyte-Epiphyte-Plant/Wood Saprotroph
OTU203	Botryosphaeria	AY905555.1	Botryosphaeria viticola	309	MN427975	Phyllosticta capitalensis	499	Endophyte-Plant Pathogen
OTU204	Pyrenophora tritici-repentis	Y10924.1	P.avanae	353	MK539988	Pyrenophora grahamii	499	Plant Pathogen
OTU205	Aureobasidium pullulans	AJ244251.1	Kabatiella caulivora	346	KP860067	Aureobasidium thailandense	483	Endophyte-Plant Pathogen
OTU206	Glomus	AJ012111.1	Glomus gerdemannii	126	JQ684856	Rozellomycota		Arbuscular Mycorrhizal
OTU207	Malassezia restricta	AJ437695.1	Malassezia restricta	510	NR_103585	Malassezia restricta		Animal Pathogen
OTU208	Ramimonilia apicalis	NR_144959.1	Ramimonilia apicalis	172	HQ386247	Peltaster fructicola		Plant Pathogen
OTU209	Microglossum sp.	AJ310558.1	Phoma	320	JF495199	Pezizomycotina		Endophyte-Lichen Parasite-Litter/soil/wood Saprotroph-Plant Pathogen
OTU21	Epicoccum	AY842347.1	Epicoccum sp.	257	MH178678	Phoma	257	Endophyte-Fungal/Lichen Parasite-Plant Pathogen-Wood Saprotroph
OTU210	Phyllactinia guttata	AF011314.1	Phyllactinia guttata	359	MG917728	Phyllactinia juglandis	494	Plant Pathogen
OTU211	Phaeosphaeria pontiformis	AJ496629.1	Phaeosphaeria eustoma	344	KX515697	Phaeosphaeriaceae	499	Undefined Saprotroph
OTU212	Heterocephalacria arrabidensis	NR_073225.1	Heterocephalacria arrabidensis	91.6	KY782278	Piskurozyma fildesensis	118	Lichen Parasite
OTU213	Coprinopsis cinerea	AB071609.1	Coprinus phlyctidosporus	357	JN943126	Coprinopsis radiata	499	Undefined Saprotroph
OTU214	Tumularia aquatica	AY148101.1	Tumularia aquatica	355	KF646104	Tumularia	494	Undefined Saprotroph
OTU215	Aporospora terricola	AF049088.1	Aporospora terricola	372	MK246947	Aporospora	499	Wood Saprotroph
OTU216	Eutypa maura	AY684224.1	Eutypa maura	477	KT692592	Eutypa maura	476	Plant Pathogen
OTU217	Geomyces	AJ549924.1	Geomyces pannorum	252	HQ914924	Geomyces	294	Animal Pathogen-Soil Saprotroph
OTU218	Cochliobolus	AY923860.1	Cochliobolus australiensis	438	MN366108	Cochliobolus geniculatus	495	Endophyte-Plant Pathogen
OTU219	Sclerotinia sclerotiorum	DQ117969.1	Sclerotinia sclerotiorum	510	MN550912	Botrytis cinerea	499	Plant Pathogen
OTU22	Cystobasidiomycetes	AB035721.1	Bannoa bischofiae	163	AB035717	Bannoa ogasawarensis	168	Saprotrophic
OTU220	Botryosphaeria	AY942180.1	Botryosphaeria rhodina	257	MG827505	Fungi	494	Plant Pathogen
OTU221	Quambalaria cyanescens	NR_111202.1	Q. cyanescens (Microstroma phylloplanum)	130	MF671959	Laurobasidium hachijoense	499	Plant Pathogen
OTU222	Botryosphaeria	AJ875379.1	Uncultured fungus	305	KT196392	Fungi	389	Endophyte-Plant Pathogen
OTU223	Aureobasidium pullulans	AJ876480.1	Aureobasidium pullulans	492	KY782278	Aureobasidium namibiae	494	Animal Pathogen-Endophyte-Epiphyte-Plant Pathogen
OTU224	Lyophyllum	AF141634.1	Phlebiopsis gigantea	113	MH451371	Fungi	409	Undefined Saprotroph
OTU225	Diaporthe	AJ875377.1	Uncultured fungus	220	LC169833	Diaporthe	499	Endophyte-Plant Pathogen
OTU226	Umbilicaria crustulosa	AY843154.1	Phaeococcomyces nigricans	156	KP897357	Fungi	342	Undefined Saprotroph
OTU227	Paecilomyces sp.	AJ309362.1	Paecilomyces sp.	279	KJ869158	Beltrania pseudorhombica	494	Endophyte
OTU228	Neoplaconema	AJ534443.1	Neoplaconema gloeosporioides	477	MH259187	Paraphoma chrysanthemicola	499	Plant Pathogen
OTU229	Saccharomycetales	AM182450.1	Uncultured Saccharomycetale	494	MG020712	Debaryomyces hansenii	494	Undefined Saprotroph
OTU23	Blumeria graminis	AJ313138.1	Blumeria graminis	315	MK418444	Blumeria sp.	318	Plant Pathogen
OTU230	Mrakia frigida	AF144482.1	Mrakia frigida	183	MF615053	Cystofilobasidiales		Soil Saprotroph-Undefined Saprotroph
OTU231	Sclerotinia sp.	AJ279480.1	Sclerotinia sp.	451	MH871883	Botrytis cinerea	441	Plant Pathogen
OTU232	Omphalina	AY840564.1	Coriolaceae sp.	122	KX193281	Fungi	405	Undefined Saprotroph
OTU233	Bensingtonia	AB040116.1	Bensingtonia thailandica	73.1	MN194597	Ruinenia	410	Undefined Saprotroph
OTU24	Stenella araguata	AJ244260.1	Stenella araguata /Trimmatostroma sp.	268	AJ244260	Stenella araguata	264	Undefined Saprotroph
OTU25	Pleosporaceae	Y17066	Alternaria infectoria	349	AF081456.1	Alternaria infectoria	357	Animal Pathogen
OTU26	Rhodotorula mucilaginosa	AB038074.1	Rhodotorula mucilaginosa	281	NR_073270	Rhodotorula dairenensis	275	Animal Pathogen
OTU27	Acrodontium crateriforme	AY843112.1	Acrodontium crateriforme	198	MH860375	Acrodontium sp.	268	Plant Pathogen
OTU28	Sordariomycetes	AJ301998.1	Myrothecium sp.	80.5	AB746930	Sordariomycetes	280	Undefined Saprotroph-Plant Pathogen
OTU29	Pringsheimia euphorbiae	NR_145344.1	Pringsheimia euphorbiae	189	EF505549	Phaeosphaeriaceae	342	Fungal Parasite-Plant Pathogen-Plant Saprotroph
OTU3	Cladosporium sphaerospermum	AM176713.1	Cladosporium sphaerospermum	263	MN518383	Cladosporium sphaerospermum	257	Endophyte
OTU30	Sordariomycetes	AM176717.1	Pestalosphaeria hansenii	342	MK862235	Pestalotiopsis disseminata	351	Plant Pathogen
OTU31	Dioszegia fristingensis	NR_136970.1	Dioszegia fristingensis	211	KY103352	Dioszegia fristingensis	206	Undefined Saprotroph
OTU32	Cryptococcus	AY040655.1	Cryptococcus victoriae	246	NR_073260	Vishniacozyma victoriae	241	Animal Pathogen-Litter Saprotroph
OTU33	Fusarium sp.	AJ222809.1	Fusarium sp.	235	MN337134	Nigrospora oryzae	279	Endophyte-Plant Pathogen
OTU34	Agaricomycetes	AJ416068.1	Antrodia sinuosa	335	KC951153	Antrodia xantha	338	Wood Saprotroph
OTU35	Sporidiobolaceae	AY015438.1	Sporobolomyces roseus	279	MH854932	Sporobolomyces roseus	273	Fungal Parasite-Litter Saprotroph
OTU36	Tremellomycetes	AF444417.1	Tausonia pullulans	283	MF186053	Tausonia pullulans	277	Undefined Saprotroph
OTU37	Glomerellaceae	AB087217.1	C.gloeosporioides/ Glomerella cingulata	316	MK914624	C. gloeosporioides / C. siamense	309	Endophyte-Plant Pathogen
OTU38	Mycosphaerella	AF173304.1	Mycosphaerella lateralis	267	MN065463	Uwebraunia communis	289	Plant Pathogen
OTU39	Mycosphaerella	AY509757.1	Mycosphaerella gregaria	261	KC978081	Phaeophleospora	293	Plant Pathogen
OTU4	Cladosporium	AJ300336.1	Cladosporium sp.	289	MN328055	Cladosporium limoniforme	282	Animal/Plant Pathogen-Endophyte-Lichen Parasite-Wood Saprotroph
OTU40	leotiomyceta	AJ243777.1	Cordyceps sp.	257	MN421910	Neopestalotiopsis foedans	257	Animal Pathogen-Clavicipitaceous Endophyte-Fungal Parasite
OTU41	Humicola fuscoatra	AJ279444.1	Humicola fuscoatra	263	MK268064	Rhizopus arrhizus	257	Endophyte-Wood Saprotroph
OTU42	Nemania	AB041994.1	Beech leaf mycelium	217	MK304248	Nemania diffusa	316	Endophyte
OTU43	Dioszegia	AY562157.1	Dioszegia crocea	185	MN128839	Bullera crocea	187	Undefined Saprotroph
OTU44	Hypoxylon perforatum	AJ390407.1	Hypoxylon perforatum	99	MG490196	Hypoxylon pilgerianum	343	Endophyte
OTU45	Preussia sp.	AY510416.1	Preussia intermedia	228	MK872802	Preussia sp.	250	Undefined Saprotroph
OTU46	Pleosporineae	DQ087400.1	Phoma pinodella	219	MK299419	Phoma	253	Plant Pathogen
OTU47	Myrothecium	AJ301992.1	Myrothecium leucotrichum	272	MF754101	Myrothecium	289	Undefined Saprotroph-Plant Pathogen
OTU48	Aspergillus sp.	NR_131268.1	Aspergillus japonicus	326	MN310533	Aspergillus versicolor	287	Animal Pathogen
OTU49	Helotiales	AJ875355.1	Uncultured fungus	294	JF495199	Pezizomycotina	293	na
OTU5	Dioszegia hungarica	NR_073227.1	Dioszegia hungarica	209	MG980594	Uwebraunia dekkeri	289	Undefined Saprotroph
OTU50	Phaeosclera sp.	AY843108.1	Fungal sp.	71.3	JN084025	Elsinoaceae	365	Plant Pathogen
OTU51	leotiomyceta	AB054052.1	Aspergillus flavus	335	MN545453	Aspergillus flavus	327	Animal Pathogen-Plant Pathogen-Wood Saprotroph
OTU52	Ramularia sp.	AY853189.1	Ramularia sp.	158	KT360162	Fungi	246	Plant Pathogen
OTU53	Mycocalicium sp.	AJ312123.1	Mycocalicium victoriae	267	AY128702	Mycocalicium victoriae	260	Lichenized
OTU54	Capnodiales	AY509769.1	Mycosphaerella mexicana	87.9	KY591536	Neohortaea acidophila	264	Plant Pathogen
OTU55	leotiomyceta	AM158197.1	Penicillium chrysogenum	324	NR_077145	Penicillium chrysogenum	316	Plant Pathogen
OTU56	Aspergillaceae	AM159632.1	Eurotium amstelodami	263	MK852551	Eurotium sp.	257	Endophyte
OTU57	Plectosphaerella cucumerina	AJ492873.1	Plectosphaerella cucumerina	250	MN523210	Plectosphaerella cucumerina	244	Endophyte
OTU58	Filobasidium	NR_073223.1	Filobasidium chernovii	276	MG589242	Filobasidium chernovii	275	Undefined Saprotroph
OTU59	Paecilomyces	AB099511.1	Paecilomyces marquandii	244	MH865307	Paecilomyces		Clavicipitaceous Endophyte-Undefined/Saprotroph-Plant Pathogen
OTU6	Erysiphaceae	AF011313.1	Oidium sp.	263	MK432779	Sawadaea bicornis	315	Plant Pathogen
OTU60	Mycosphaerella	AY509742.1	Mycosphaerella aurantia	172	KF901657	Mycodiella sumatrensis	241	Plant Pathogen
OTU61	Mycocalicium sp.	AJ312123.1	Mycocalicium victoriae	69.4	MG245311	Fungi	187	Lichenized
OTU62	Phaeosphaeriopsis	AF250819.1	Phaeosphaeriopsis glauco-punctata	106	KT328681	Leptospora thailandica	352	Plant Pathogen
OTU63	Mycosphaerellaceae	AF173307.1	Mycosphaerella tasmaniensis	180	MK876405	Pseudocercospora pseudomyrticola	262	Plant Pathogen
OTU64	Penicillium olsonii	DQ117963.1	Penicillium olsonii	318	MN340986	Penicillium olsonii	311	Anamorph
OTU65	Pezizomycotina	AJ279473.1	Ascomycete sp.	241	MK722683	Fungi sp.	253	na
OTU66	Papiliotrema pseudoalba	AF444442.1	Papiliotrema pseudoalba	209	NR_073231	Papiliotrema pseudoalba	205	na
OTU67	Ascomycota	Z99665.1	Botrytis cinerea	270	Z99665	Botrytis cinerea	264	Plant Pathogen
OTU68	Tremellomycetes	NR_077106.1	Filobasidium oeirense	167	MN128848	Filobasidium oeirense	237	Undefined Saprotroph
OTU69	Volutella ciliata	AJ301966.1	Volutella sp.	309	MH892587	Volutella ciliata	302	Plant Pathogen
OTU7	Dioszegia	AY562162.1	Dioszegia zsoltii	250	KT809156	Dioszegia zsoltii	244	Undefined Saprotroph
OTU70	Penicillium brevicompactum	AM158222.1	Penicillium biourgeianum	313	MN511351	Penicillium bialowiezense	306	Endophyte
OTU71	Dothideomycetes	U04237.1	Phaeosphaeria nodorum	171	MK281885	Sclerostagonospora	288	Plant Pathogen
OTU72	Phoma	AJ301711.1	Phoma glomerata	180	MH935059	Phoma	248	Plant Pathogen-Wood Saprotroph
OTU73	Polyporus	AF516523.1	Polyporus arcularius	340	LC415539	Lentinus arcularius	363	Wood Saprotroph
OTU74	Dothideales	AY720707.1	Coniozyma leucospermi	298	EU552113	Coniozyma leucospermi	297	Endophyte
OTU75	Polyporales	AJ249267.1	Oligoporus placentus	84.2	MG817481	Antrodia tropica	336	Wood Saprotroph
OTU76	Septoria sp.	AJ300330.1	Septoria tritici	217	U77363	Zymoseptoria tritici	217	Plant Pathogen
OTU77	Biscogniauxia simplicior	AJ390416.1	Biscogniauxia simplicior	87.9	MK442633	Zygosporium pseudogibbum	288	Undefined Saprotroph
OTU78	Colletotrichum	AB046609.1	Colletotrichum linicola	337	MH638223	Colletotrichum americae-borealis		Endophyte-Plant Pathogen
OTU79	Septoria sp.	AJ300330.1	Septoria tritici	224	MH374601	Zymoseptoria verkleyi	250	Plant Pathogen
OTU8	Mycosphaerella	AY490757.1	Mycosphaerella crystallina	267	MK256452	Pallidocercospora crystallina	260	Plant Pathogen
OTU80	oat root associated euascomycete	AJ301993.1	Myrothecium roridum	108	KM652194	Hirsutella thompsonii	286	Plant Pathogen
OTU81	Leotiomycetes	AY706325.1	Leohumicola verrucosa	86.1	JN906229	Fungi sp.	140	Endophyte
OTU82	Amphisphaeria umbrina	AF009805.1	Amphisphaeria umbrina	76.8	MK862248	Xylaria escharoidea	280	Plant Pathogen-Wood Saprotroph
OTU83	Bullera	AB022936.1	Bullera sp.	246	AF314983	Derxomyces pseudoschimicola	307	Epiphyte-Litter Saprotroph
OTU84	Myrothecium atroviride	AJ302000.1	Myrothecium sp.	300	MN227480	Xepicula leucotricha	298	Plant Pathogen-Wood Saprotroph
OTU85	Coniothyrium cereale	AJ293812.1	Coniothyrium cereale	291	KU302779	Neosetophoma	334	Plant Pathogen-Wood Saprotroph
OTU86	Diaporthales	AB017719.1	Phomopsis sp.	315	MN266203	Phomopsis velata	309	Plant Pathogen
OTU87	Peniophora	AF119518.1	Peniophora cinerea	327	MK588767	Peniophora	349	Wood Saprotroph
OTU88	Dothideomycetes	AJ244268.1	Trimmatostroma sp.	178	LT547770	Teratosphaeriaceae	264	Lichen Parasite
OTU89	Pleosporineae	AJ301708.1	Coniothyrium sp.	139	MN153805	Alternaria longissima	304	Endophyte-Plant Pathogen
OTU9	Agaricomycetes	AJ242904.1	Rhizoctonia sp.	311	MN430946	Sistotrema brinkmannii	311	Ectomycorrhizal-Wood Saprotroph
OTU90	Cystobasidiomycetes	AJ875378.1	Uncultured fungus	161	KC525748	Erythrobasidiales	257	na
OTU91	Agaricomycetes incertae sedis	AF210822.1	Peniophora aurantiaca	237	KX611640	Peniophora	347	Plant Pathogen-Wood Saprotroph
OTU92	Botryosphaeria sp.	AF027760	Lasiodiplodia theobromae	235	MN519703	Lasiodiplodia mediterranea	246	Endophyte-Plant Pathogen
OTU93	Dothideomycetes	AY843139.1	Fungal sp.	172	KT833157	Dothideomycetes	197	na
OTU94	Pezizomycotina	AM159633.1	Uncultured Pezizomycotina	248	MK190675	Neoascochyta graminicola	253	na
OTU95	leotiomyceta	AM158216.1	Paecilomyces lilacinus	348	MN177620	Purpureocillium lilacinum	340	Endophyte
OTU96	Botryosphaeria sp.	AB034818	Botryosphaeria sp.	244	KX379683	Sardiniella urbana	300	Endophyte-Plant Pathogen
OTU97	Pyrenophora tritici-repentis	AF071348.1	Pyrenophora tritici-repentis	254	MK539988	Pyrenophora grahamii	327	Plant Pathogen
OTU98	Coniosporium sp.	AJ244272.1	Coniosporium apollinis	204	AJ971451	Coniosporium sp.	275	Undefined Saprotroph
OTU99	Sordariomycetes	AJ390432.1	Nemania serpens	75	MH003394	Xylariaceae	277	Endophyte
